# Supplementary material for: Comparative analysis of barley dietary fiber fermented with and without Lactiplantibacillus plantarum dy-1 in promoting gut health and regulating hepatic energy metabolism in high-fat diet-induced obese mice
Source: Royal Society of Chemistry journal article supplement (doi:10.1039/d4fo04776a), 2024-11-22
Supplement: d4fo04776a1.pdf [file d4fo04776a1.pdf]

Table S1 The main composition of RBDF and FBDF

| Sample | Dietary fiber<br>(g/100g)     | Protein<br>(g/100g)          | Moisture<br>(g/100g)         | Total<br>polysaccharides<br>(g/100g) | Ash<br>(g/100g)              | Total free<br>phenolics ( $\mu$ g<br>GAE/g) |
|--------|-------------------------------|------------------------------|------------------------------|--------------------------------------|------------------------------|---------------------------------------------|
| RBDF   | 77.17 $\pm$ 1.41 <sup>b</sup> | 3.92 $\pm$ 0.11 <sup>b</sup> | 1.57 $\pm$ 0.08 <sup>b</sup> | 34.97 $\pm$ 2.04 <sup>a</sup>        | 5.31 $\pm$ 0.11 <sup>a</sup> | 187.08 $\pm$ 1.79 <sup>b</sup>              |
| FBDF   | 86.91 $\pm$ 2.22 <sup>a</sup> | 4.27 $\pm$ 0.04 <sup>a</sup> | 3.31 $\pm$ 0.18 <sup>a</sup> | 31.33 $\pm$ 2.10 <sup>b</sup>        | 4.16 $\pm$ 0.02 <sup>b</sup> | 1261.67 $\pm$ 10.46 <sup>a</sup>            |

Values are expressed as means  $\pm$  SD. Values in the same line with different letters were considered significantly different ( $P < 0.05$ ).

Table S2 The energy of normal diet (ND) and high fat diet (HFD)

|                       | ND    | HFD   |
|-----------------------|-------|-------|
| Fat (kcal %)          | 12.79 | 60.65 |
| Protein (kcal %)      | 20.54 | 18.14 |
| Carbohydrate (kcal %) | 66.67 | 21.22 |
| Total (kcal/kg)       | 3660  | 5128  |

Table S3 The feed formula

| Ingredient                    | Content (%) |      |      |
|-------------------------------|-------------|------|------|
|                               | HFD         | RBDF | FBDF |
| Basic diet                    | 32.5        | 22.5 | 22.5 |
| Lard                          | 28          | 28   | 28   |
| Sucrose                       | 8           | 8    | 8    |
| Whole milk powder             | 10.8        | 10.8 | 10.8 |
| Casein                        | 13.5        | 13.5 | 13.5 |
| Premix for laboratory animals | 3           | 3    | 3    |
| RBDF                          | /           | 10   | /    |
| FBDF                          | /           | /    | 10   |
| Microcrystalline cellulose    | 2           | 2    | 2    |
| Calcium bicarbonate           | 1.8         | 1.8  | 1.8  |
| Mountain flour                | 0.4         | 0.4  | 0.4  |

Premix for laboratory animals contains 16% maltodextrin 10, 6% mineral mix, 0.3% choline bitartrate, 0.3% L-Cystine, and 0.1% vitamin mix.

Table S4 Primer sequences used for real-time quantitative PCR

| Gene            | Forward primer (5'-3')    | Reverse primer (5'-3')  |
|-----------------|---------------------------|-------------------------|
| <i>GAPDH</i>    | ACATCATCCCTGCATCCACT      | GTCCTCAGTGTAGCCCAAG     |
| <i>Per2</i>     | AGCGGCTGCAGTAGTGA         | TACTTCAAGGTTGCCAGCGT    |
| <i>Tgm1</i>     | CTGTTGGTCCCGTCCCAA        | GGACCTTCCATTGTGCCTGG    |
| <i>Fgl1</i>     | GTGGATGGACTGAGCCTAGC      | TCTCACTCTCGAGGGCCCAA    |
| <i>Hdc</i>      | ACAGCACAGACAAAGGCGAC      | TAATCCACCATCTCTTCCCTCTA |
| <i>Nrg4</i>     | ACGACGAGAGAAGTCCCAGG      | TGACAGTAGCAGGGTGCAAG    |
| <i>Eif4ebp3</i> | GGAGTGCAAGAACTCACCCA      | TCAAAGTTCGTCATCGGTT     |
| <i>Myl1</i>     | GCTGACCAGATTGCCGACTT      | GAAGACACGCAGACCCTCAA    |
| <i>Spon2</i>    | GACGCTTTTGCCAGGTGATG      | TCATTCTTCCGCCACATGCT    |
| <i>Clpx</i>     | ATTAAGGAACCCGAGTCCGC      | CGATCTGAAGCAACTCTCTAGGT |
| <i>Mfap4</i>    | GGCAAGTGGACGGTTTTCCA      | GCAGAGACTTGGCTGAGGG     |
| <i>Nupr1</i>    | GGTCGGACCAAGAGAGAAGC      | GTGGTCTGGCCTTATCTCCA    |
| <i>Auts2</i>    | CCGCTCACCTAGAGCCTTTT      | GTTCTGCACACTGGGGCTAT    |
| <i>mtDNA</i>    | AGGAGCCTGTTCTATAATCGATAAA | GATGGCGGTATATAGGCCGAA   |
| <i>RBM15</i>    | GGACAGTTTTTCTGGGCAAC      | AGTTTGGCCCTGTGAGACAT    |

Fig. S1

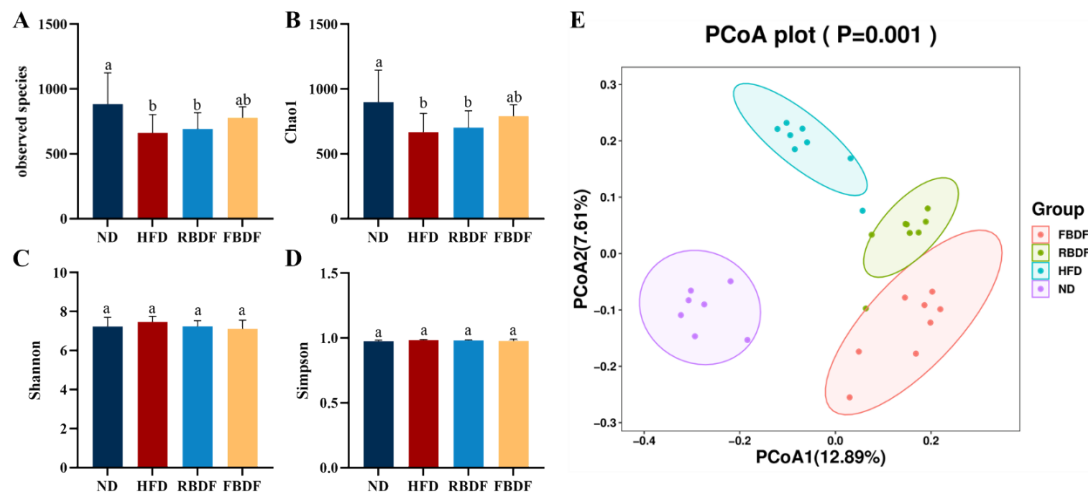

**Fig.S1** Effects of RBDF and FBDF on gut microbiota  $\alpha$ -diversity and  $\beta$  diversity in mice. (A) Observed species index; (B) Chao1 index ;(C) Shannon diversity index; (D) Simpson diversity index, (E) PCoA score plot. Different letters above the bars indicate significant differences ( $p < 0.05$ ).

Fig.S2

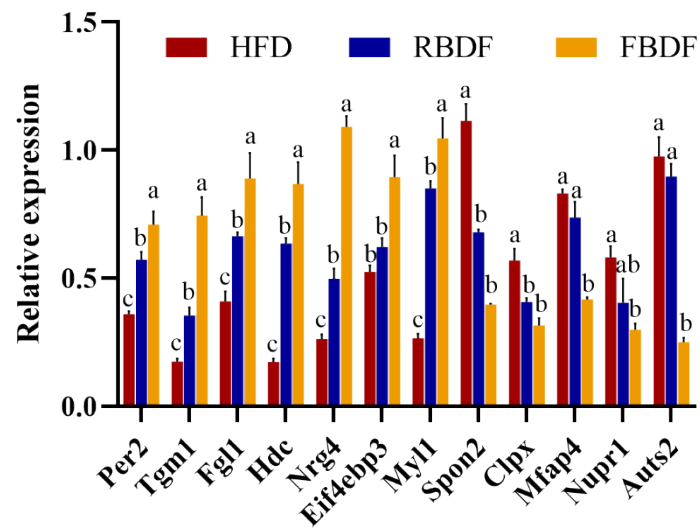

Fig.S2 Realtime-PCR quantification of the partial genes involved in the biological processes based on the hepatic transcriptome. Different letters above the bars indicate significant differences ( $p < 0.05$ ).
